# Supplementary material
Source: PubMed Central journal article supplement (PMC6333887)

## Supplementary Figure Legends

### **Supplementary Figure 1. Effect of GlcN on M1/M2 marker gene expression in IL-4-stimulated bone marrow-derived macrophage (BMDM)**

Mouse BMDM cells were pretreated with GlcN (5 mM) for 2 h and stimulated with IL-4 (20 ng/mL). At 24 h, RT-PCR was performed to analysis of *Mgl-1*, *Arg-1*, *Relma* (M1 marker), *Mmr* (M2 marker) mRNA expression. *Gapdh* was used as a control. Gels are representative of three independent experiments.

### **Supplementary Figure 2. Effects of LPS on survival rate in adult zebrafish**

Zebrafish (n=5, each group) were subjected to intraperitoneal injection with LPS (100, 500, 1,000, and 2,000 µg/g) or PBS. Survival of control and LPS-injected zebrafish was recorded over 4 days.

### **Supplementary Figure 3. The LPS-induced O-GlcNAcylation changes in proteins of lung tissue**

Mice were intraperitoneal injected with PBS or LPS (5 mg/kg). Total lysates from lung after 10 min and 6 h LPS challenge were prepared and O-GlcNAcylation levels were analyzed by Western blotting using the CTD110.6 antibody. Representative Western blot images were shown and quantified a spectral mode of O-GlcNAcylation using Image J. Blots are representative of three independent experiments.

### **Supplementary Figure 4. Changes in O-GlcNAcylation, OGT, and OGA levels in various cell types in response to LPS and/or GlcN**

Cells were pre-treated with GlcN (5 mM) for 2 h, followed by stimulation with LPS (100 ng/ml) for 24 h. Whole cell lysates were prepared and subjected to western blot analysis using O-GlcNAc, OGT, and OGA antibody. GAPDH was used as control. Blots are representative of three independent experiments.

### **Supplemental Figure 5. Effect of PUGNAc on LPS-induced IL-1β secretion in RAW264.7 cells**

RAW264.7 cells were pre-treated with PUGNAc (50 µM) for 1 h, followed by stimulation with LPS (100 ng/ml) for 24 h. (A) Levels of IL-1β in culture medium were determined via ELISA assay. (B) Secreted IL-1β were measured by Western blotting using anti-IL-1β antibody. All values are presented as means ± SEM. \*denotes significantly increased from untreated control (\*p<0.05).

## Supplemental Fig. 1

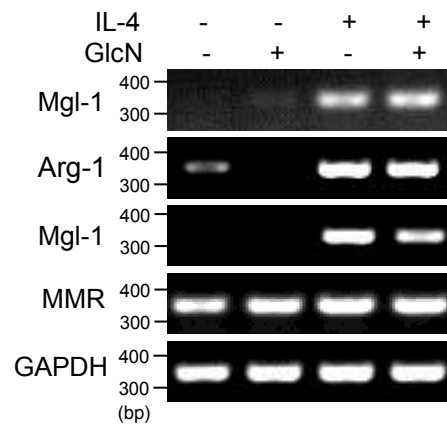

**Supplemental Fig. 2**

| Time (h) | Number of zebrafish survived |          |          |           |           |
|----------|------------------------------|----------|----------|-----------|-----------|
|          | Cont                         | LPS      |          |           |           |
|          |                              | 100 µg/g | 500 µg/g | 1000 µg/g | 2000 µg/g |
| 0        | 5                            | 5        | 5        | 5         | 5         |
| 2        | 5                            | 5        | 5        | 5         | 5         |
| 6        | 5                            | 5        | 5        | 5         | 5         |
| 12       | 5                            | 5        | 5        | 5         | 5         |
| 24       | 5                            | 5        | 5        | 5         | 5         |
| 48       | 5                            | 5        | 5        | 5         | 5         |
| 72       | 5                            | 5        | 5        | 5         | 5         |
| 96       | 5                            | 5        | 5        | 5         | 5         |

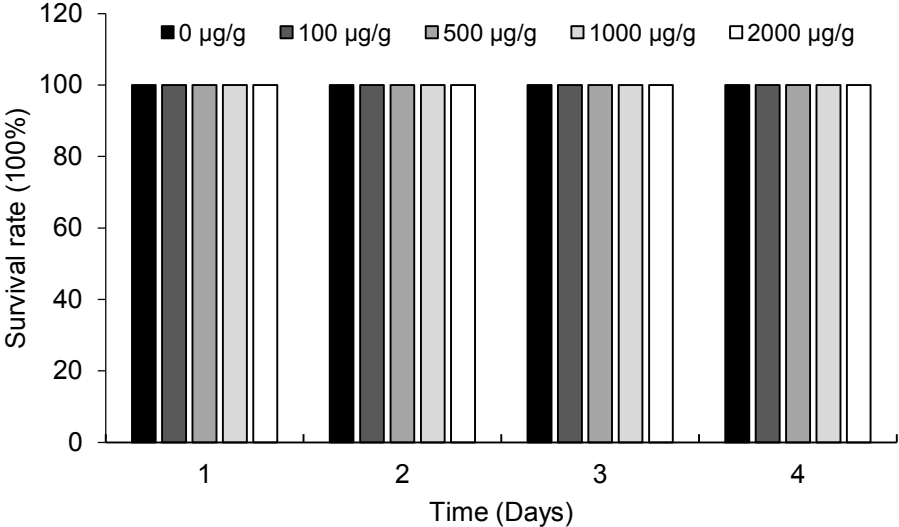

### Supplemental Fig. 3

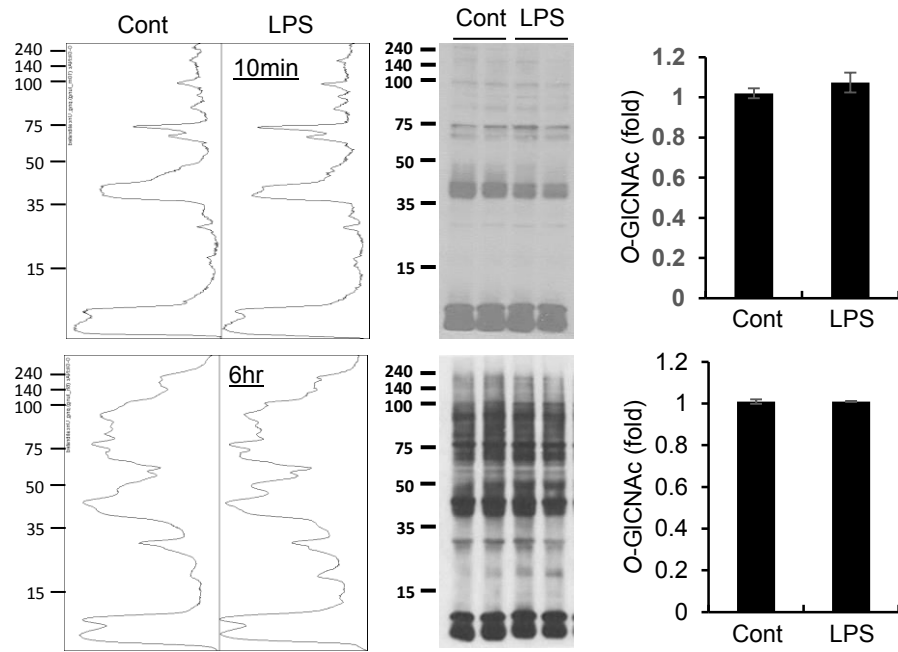

## Supplemental Fig. 4

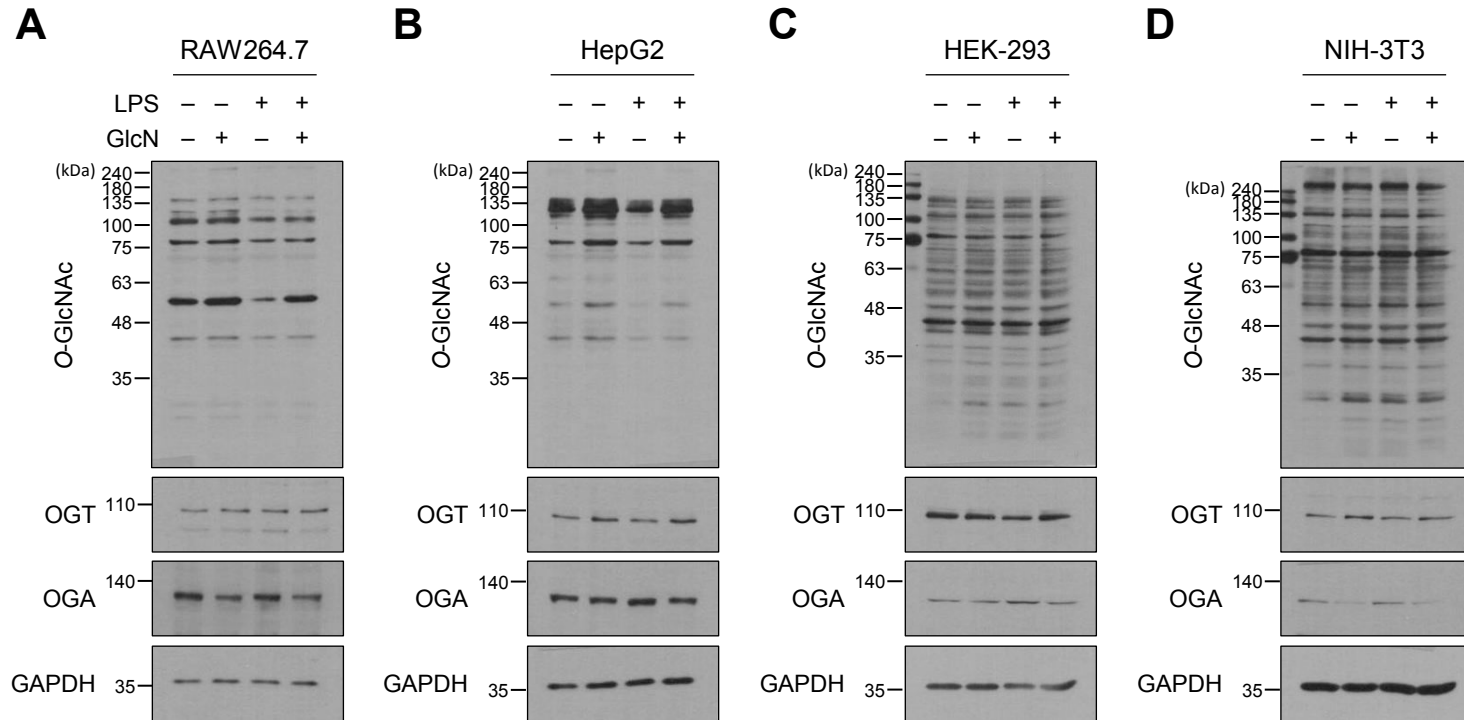

## Supplemental Fig. 5

**A**

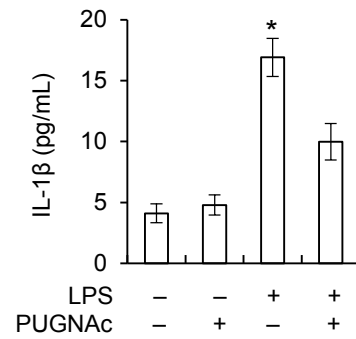

**B**

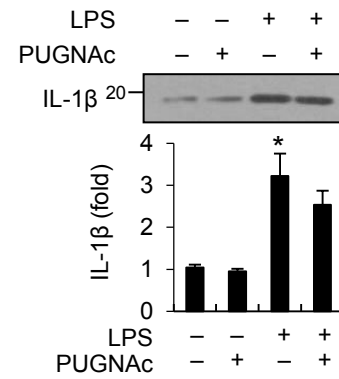

Supplement: supp_RA118.004638_139083_2_supp_235501_pr8rty.pdf [file supp_RA118.004638_139083_2_supp_235501_pr8rty.pdf]
